# Supplementary material for: Identification of a novel mechanism of action of bovine IgG antibodies specific for Staphylococcus aureus
Source: Vet Res. 2018 Feb 26;49:22. doi: 10.1186/s13567-018-0517-y (PMC5828400; doi:10.1186/s13567-018-0517-y)
Supplement: Supplementary file 1 — Additional file 1. Characteristics of 21 bacteria and Archaea Pyrococcus horikoshii selected for studying the evolutionary relationships based on the sequence of 16s rRNA. [file 13567_2018_517_MOESM1_ESM.xlsx]

## Sheet: Additional file 1
Additional file 1: Characteristics of 21 bacteria and Archaea Pyrococcus horikoshii selected for studying the evolutionary relationships based on the sequence of 16s RNA.
1	Pyrococcus horikoshii OT3 (Type)
		Accession	BA000001
		Strain	OT3 (Type)
		Taxonomy	Archaea;Euryarchaeota;Thermococci;Thermococcales;Thermococcaceae;Pyrococcus
		Sequence	ATTCCGGTTGATCCTGCCGGAGGCCACTGCTATGGGGGTCCGACTAAGCCATGCGAGTCAAGGGGGCGTCCCTTCTGGGACGCCACCGGCGGACGGCTCAGTAACACGTCGGTAACCTACCCTCGGGAGGGGGATAACCCCGGGAAACTGGGGCTAATCCCCCATAGGCCTGGGGTACTGGAAGGTCCCCAGGCCGAAAGGGAGCCGTAAGGCTCCGCCCGAGGATGGGCCGGCGGCCGATTAGGTAGTTGGTGGGGTAACGGCCCACCAAGCCGAAGATCGGTACGGGCCGTGAGAGCGGGAGCCCGGAGATGGACACTGAGACACGGGTCCAGGCCCTACGGGGCGCAGCAGGCGCGAAACCTCCGCAATGCGGGAAACCGCGACGGGGGGACCCCC…
2	Thermotoga maritima MSB8 (Type)
		Accession	AE000512
		Strain	MSB8 (Type)
		Taxonomy	Bacteria;Thermotogae;Thermotogae_c;Thermotogales;Thermotogaceae;Thermotoga
		Sequence	GGTGAACGCTGGCGGCGTGCCTAACACATGCAAGTCGAGCGGGGGAAACTCCCTTCGGGGAGGAGTACCCAGCGGCGGACGGGTGAGTAACACGTGGGTAACCTGCCCTCCGGAGGGGGATAACCAGGGGAAACCCTGGTTAATACCCCATACGCTCCATCAACGCAAGTTGGTGGAGGAAAGGGGCGTTTGCCCCGCCGGAGGAGGGGCCCGCGGCCCATCAGGTAGTTGGTGGGGTAACGGCCCACCAAGCCGACGACGGGTAGCCGGCCTGAGAGGGTGGTCGGCCACAGGGGCACTGAGACACGGGCCCCACTCTACGGGAGGCAGCAGTGGGGAATCTTGGACAATGGGGGAAACCCTGATCCAGCGACGCCGCGTGCGGGACGAAGCCTTCGG…
3	Aquifex pyrophilus Kol5a (Type)
		Accession	M83548
		Strain	Kol5a (Type)
		Taxonomy	Bacteria;Aquificae;Aquificae_c;Aquificales;Aquificaceae;Aquifex
		Sequence	CGCGAACGCTGGCGGCGTGCCTAACACATGCAAGTCGTGCGCAGGCTCGCTCCCTCTGGGAGCGGGTGCTGAGCGGCAAACGGGTGAGTAACACGTGGGTAACCTACCCCCAGGAGGGGGATAACCCCGGGAAACCGGGGCTAATACCCCATAAAGCCGCCCGCCACTAAGGCGAGGCGGCCAAAGGGGGCCTCTGGGCTCTGCCCAAGCTCCCGCCTGGGGATGGGCCCGCGGCCCATCAGGTAGTTGGTGGGGTAACGGCCCACCAAGCCTATGACGGGTAGCCGGCCTGAGAGGGTGGCCGGCCACAGCGGGACTGAGACACGGCCCGCACCCCTACGGGGGGCAGCAGTGGGGAATCGTGGGCAATGGGCGAAAGCCTGACCCCGCGACGCCGCG…
4	Chloroflexus aurantiacus J-10-fl (Type)
		Accession	CP000909
		Strain	J-10-fl (Type)
		Taxonomy	Bacteria;Chloroflexi;Chloroflexia;Chloroflexales;Chloroflexaceae;Chloroflexus
		Sequence	GACGAACGCTGGCGGCGTGCCTAATGCATGCAAGTCGAACGCAGCAGGCGTGCCTGGCTGCGTGGCGAACGGCTGAGGAACACGTGGGTGACCTGCCCCGGAGTGGGGGATACCCCGTCGAAAGACGGGACAATCCCGCATACGCTCGACGGAGGAAAGCCGCAAGGCGCTCTGGGAGGGGCCTGCGGCCCATCAGGTAGTTGGTGTGGTAACGGCGCACCAAGCCAATGACGGGTACCCGGTCTGAGAGGACGACCGGGCAGACTGGGACTGAGACACGGCCCAGACTCCTACGGGAGGCAGCAGCAAGGAATTTTCCCCAATGGGCGCAAGCCTGAGGGAGCAACGCCGCGTGGAGGACGACGGCCTTCGGGTTGTAAACTCCTTTCGGGTGGGACG…
5	Chlorobaculum tepidum TLS (Type)
		Accession	AE006470
		Strain	TLS (Type)
		Taxonomy	Bacteria;Chlorobi;Chlorobia;Chlorobiales;Chlorobiaceae;Chlorobaculum
		Sequence	GACGAACGCTGGCGGCGTGCCTAACACATGCAAGTCAAAGTTTGAGTAACTTCGGTTACAAAGACTTGGCGCAAGGGTGAGTAAGGCATAGGTAATCTGCCTTTTGGTCTGGGATAACCCCGAGAAATCGGGAACAATACCAGATGATGCAGCGGAATCGCATGGTTATGTTGTTAAAGATTTATCGCCAAAAGATGAGCCTATGTTCCATCAGGTAGTTGGTAGGGTAACGGCCTACCAAGCCTACGACGGATAGCTGGTCTGAGAGGATGATCAGCCACATTGGAACTGAGACACGGTCCAGACTCCTACGGGAGGCAGCAGTGAGGAATATTGCGCAATGGGCGAAAGCCTGACGCAGCAACGCCGCGTGGATGATGAAGTTCTTCGGAATGTAAA…
6	Deinococcus radiodurans DSM 20539 (Type)
		Accession	Y11332
		Strain	DSM 20539 (Type)
		Taxonomy	Bacteria;Deinococcus-Thermus;Deinococci;Deinococcales;Deinococcaceae;Deinococcus
		Sequence	GGTGAACGCTGGCGGCGTGCTTAAGACATGCAAGTCGAACGCGGTCTTCGGACCGAGTGGCGCACGGGTGAGTAACACGTAACTGACCTACCCAGAAGTCACGAATAACTGGCCGAAAGGTCCGCTAATACGTGATGTGGTGATGCACCGTGGTGCATCACTAAAGATTTATCGCTTCTGGATGGGGTTGCGTTCCATCAGCTGGTTGGTGGGGTAAAGGCCTACCAAGGCGACGACGGATAGCCGGCCTGAGAGGGTGGCCGGCCACAGGGGCACTGAGACACGGGTCCCACTCCTACGGGAGGCAGCAGTTAGGAATCTTCCACAATGGGCGCAAGCCTGATGGAGCGACGCCGCGTGAGGGATGAAGGTTTTCGGATCGTAAACCTCTGAATCTGG…
7	Helicobacter pylori NCTC 11638 (Type)
		Accession	AIHX01000070
		Strain	NCTC 11638 (Type)
		Taxonomy	Bacteria;Proteobacteria;Epsilonproteobacteria;Campylobacterales;Helicobacteraceae;Helicobacter
		Sequence	AGTGAACGCTGGCGGCGTGCCTAATACATGCAAGTCGAACGATGAAGCTTCTAGCTTGCTAGAATGCTGATTAGTGGCGCACGGGTGAGTAACGCATAGGTCATGTGCCTCTTAGTTTGGGATAGCCATTGGAAACGATGATTAATACCAGATACTCCCTACGGGGGAAAGATTTATCGCTAAGAGATCAGCCTATGTCCTATCAGCTTGTTGGTAAGGTAATGGCTTACCAAGGCTATGACGGGTATCCGGCCTGAGAGGGTGAACGGACACACTGGAACTGAGACACGGTCCAGACTCCTACGGGAGGCAGCAGTAGGGAATATTGCTCAATGGGGGAAACCCTGAAGCAGCAACGCCGCGTGGAGGATGAAGGTTTTAGGATTGTAAACTCCTTTT…
8	Cyanobacterium aponinum PCC 10605
		Accession	CP003947
		Strain	PCC 10605
		Taxonomy	Bacteria;Cyanobacteria;Chroobacteria;Chroococcales;Cyanobacteriaceae;Cyanobacterium
		Sequence	GATGAACGCTGGCGGTATGCCTAACACATGCAAGTCGAACGGGCTCTTCGGAGCTAGTGGCGGACGGGTGAGGAACGCGTGAGAACCTGCCTCAAGGTCGGGGACAACAGTTGGAAACGACTGCTAATACCGGATGAGCCGAATAGGTAAAAGATTTATCGCCTAGAGAGGGGCTCGCGTCTGATTAGCTAGATGGTGAGGTAAAGGCTTACCATGGCGACGATCAGTAGCTGGTCTGAGAGGATGAGCAGCCACACTGGGACTGAGACACGGCCCAGACTCCTACGGGAGGCAGCAGTGGGGAATTTTCCGCAATGGGCGAAAGCCTGACGGAGCAATACCGCGTGAGGGAGGAAGGCTCTTGGGTTGTAAACCTCAAAACTTAGGGAAGAAAAAAAT…
9	Leptospira interrogans RGA (Type)
		Accession	AOVR01000059
		Strain	RGA (Type)
		Taxonomy	Bacteria;Spirochaetes;Spirochaetes_c;Spirochaetales;Leptospiraceae;Leptospira
		Sequence	AACTAACGCTGGCGGCGCGTCTTAAACATGCAAGTCAAGCGGAGTAGCAATACTCAGCGGCGAACGGGTGAGTAACACGTGGGTAATCTTCCTCTGAGTCTGGGATAACTTTCCGAAAGGGAAGCTAATACTGGATGGTCCCGAGAGATCATAAGATTTTTCGGGTAAAGATTTATTGCTCGGAGATGAGCCCGCGTCCGATTAGCTAGTTGGTGAGGTAAAGGCTCACCAAGGCGACGATCGGTAGCCGGCCTGAGAGGGTGTTCGGCCACAATGGAACTGAGACACGGTCCATACTCCTACGGGAGGCAGCAGTTAAGAATCTTGCTCAATGGGGGGAACCCTGAAGCAGCGACGCCGCGTGAACGATGAAGGTCTTCGGATTGTAAAGTTCAGTAA…
10	Salmonella enterica subsp. enterica LT2 (Type)
		Accession	AE006468
		Strain	LT2 (Type)
		Taxonomy	Bacteria;Proteobacteria;Gammaproteobacteria;Enterobacteriales;Enterobacteriaceae;Salmonella;Salmonella enterica
		Sequence	ATTGAACGCTGGCGGCAGGCCTAACACATGCAAGTCGAACGGTAACAGGAAGCAGCTTGCTGCTTCGCTGACGAGTGGCGGACGGGTGAGTAATGTCTGGGAAACTGCCTGATGGAGGGGGATAACTACTGGAAACGGTGGCTAATACCGCATAACGTCGCAAGACCAAAGAGGGGGACCTTCGGGCCTCTTGCCATCAGATGTGCCCAGATGGGATTAGCTTGTTGGTGAGGTAACGGCTCACCAAGGCGACGATCCCTAGCTGGTCTGAGAGGATGACCAGCCACACTGGAACTGAGACACGGTCCAGACTCCTACGGGAGGCAGCAGTGGGGAATATTGCACAATGGGCGCAAGCCTGATGCAGCCATGCCGCGTGTATGAAGAAGGCCTTCGGGT…
11	Escherichia coli ATCC 11775 (Type)
		Accession	JMST01000030
		Strain	ATCC 11775 (Type)
		Taxonomy	Bacteria;Proteobacteria;Gammaproteobacteria;Enterobacteriales;Enterobacteriaceae;Escherichia
		Sequence	ATTGAACGCTGGCGGCAGGCCTAACACATGCAAGTCGAACGGTAACAGGAAGCAGCTTGCTGCTTTGCTGACGAGTGGCGGACGGGTGAGTAATGTCTGGGAAACTGCCTGATGGAGGGGGATAACTACTGGAAACGGTAGCTAATACCGCATAACGTCGCAAGACCAAAGAGGGGGACCTTAGGGCCTCTTGCCATCGGATGTGCCCAGATGGGATTAGCTAGTAGGTGGGGTAACGGCTCACCTAGGCGACGATCCCTAGCTGGTCTGAGAGGATGACCAGCCACACTGGAACTGAGACACGGTCCAGACTCCTACGGGAGGCAGCAGTGGGGAATATTGCACAATGGGCGCAAGCCTGATGCAGCCATGCCGCGTGTATGAAGAAGGCCTTCGGGT…
12	Pseudomonas aeruginosa JCM 5962 (Type)
		Accession	BAMA01000316
		Strain	JCM 5962 (Type)
		Taxonomy	Bacteria;Proteobacteria;Gammaproteobacteria;Pseudomonadales;Pseudomonadaceae;Pseudomonas
		Sequence	ATTGAACGCTGGCGGCAGGCCTAACACATGCAAGTCGAGCGGATGAAGGGAGCTTGCTCCTGGATTCAGCGGCGGACGGGTGAGTAATGCCTAGGAATCTGCCTGGTAGTGGGGGATAACGTCCGGAAACGGGCGCTAATACCGCATACGTCCTGAGGGAGAAAGTGGGGGATCTTCGGACCTCACGCTATCAGATGAGCCTAGGTCGGATTAGCTAGTTGGTGGGGTAAAGGCCTACCAAGGCGACGATCCGTAACTGGTCTGAGAGGATGATCAGTCACACTGGAACTGAGACACGGTCCAGACTCCTACGGGAGGCAGCAGTGGGGAATATTGGACAATGGGCGAAAGCCTGATCCAGCCATGCCGCGTGTGTGAAGAAGGTCTTCGGATTGTAAA…
13	Neisseria gonorrhoeae NCTC 8375 (Type)
		Accession	X07714
		Strain	NCTC 8375 (Type)
		Taxonomy	Bacteria;Proteobacteria;Betaproteobacteria;Neisseriales;Neisseriaceae;Neisseria
		Sequence	ATTGAACGCTGGCGGCATGCTTTACACATGCAAGTCGGACGGCAGCACAGGGAAGCTTGCTTCTCGGGTGGCGAGTGGCGAACGGGTGAGTAACATATCGGAACGTACCGGGTAGCGGGGGATAACTGATCGAAAGATCAGCTAATACCGCATACGTCTTGAGAGGGAAAGCAGGGGACCTTCGGGCCTTGCGCTATCCGAGCGGCCGATATCTGATTAGCTGGTTGGCGGGGTAAAGGCCCACCAAGGCGACGATCAGTAGCGGGTCTGAGAGGATGATCCGCCACACTGGGACTGAGACACGGCCCAGACTCCTACGGGAGGCAGCAGTGGGGAATTTTGGACAATGGGCGCAAGCCTGATCCAGCCATGCCGCGTGTCTGAAGAAGGCCTTCGGGT…
14	Bifidobacterium longumJCM 1217 (Type)
		Accession	AP010888
		Strain	JCM 1217 (Type)
		Taxonomy	Bacteria;Actinobacteria;Actinobacteria_c;Bifidobacteriales;Bifidobacteriaceae;Bifidobacterium;Bifidobacterium longum
		Sequence	GATGAACGCTGGCGGCGTGCTTAACACATGCAAGTCGAACGGGATCCATCAAGCTTGCTTGGTGGTGAGAGTGGCGAACGGGTGAGTAATGCGTGACCGACCTGCCCCATACACCGGAATAGCTCCTGGAAACGGGTGGTAATGCCGGATGTTCCAGTTGATCGCATGGTCTTCTGGGAAAGCTTTCGCGGTATGGGATGGGGTCGCGTCCTATCAGCTTGACGGCGGGGTAACGGCCCACCGTGGCTTCGACGGGTAGCCGGCCTGAGAGGGCGACCGGCCACATTGGGACTGAGATACGGCCCAGACTCCTACGGGAGGCAGCAGTGGGGAATATTGCACAATGGGCGCAAGCCTGATGCAGCGACGCCGCGTGAGGGATGGAGGCCTTCGGGTTGT…
15	Mycobacterium tuberculosis H37Rv (Type)
		Accession	AL123456
		Strain	H37Rv (Type)
		Taxonomy	Bacteria;Actinobacteria;Actinobacteria_c;Corynebacteriales;Mycobacteriaceae;Mycobacterium
		Sequence	GACGAACGCTGGCGGCGTGCTTAACACATGCAAGTCGAACGGAAAGGTCTCTTCGGAGATACTCGAGTGGCGAACGGGTGAGTAACACGTGGGTGATCTGCCCTGCACTTCGGGATAAGCCTGGGAAACTGGGTCTAATACCGGATAGGACCACGGGATGCATGTCTTGTGGTGGAAAGCGCTTTAGCGGTGTGGGATGAGCCCGCGGCCTATCAGCTTGTTGGTGGGGTGACGGCCTACCAAGGCGACGACGGGTAGCCGGCCTGAGAGGGTGTCCGGCCACACTGGGACTGAGATACGGCCCAGACTCCTACGGGAGGCAGCAGTGGGGAATATTGCACAATGGGCGCAAGCCTGATGCAGCGACGCCGCGTGGGGGATGACGGCCTTCGGGTTGTA…
16	Rickettsia prowazekii Breinl (Type)
		Accession	CP004889
		Strain	Breinl (Type)
		Taxonomy	Bacteria;Proteobacteria;Alphaproteobacteria;Rickettsiales;Rickettsiaceae;Rickettsia
		Sequence	AACGAACGCTATCGGTATGCTTAACACATGCAAGTCGAACGGATTAACTAGAGCTCGCTTTAGTTAATTAGTGGCAGACGGGTGAGTAACACGTGGGAATCTACCCATCAGTACGGAATAACTTTTAGAAATAAAAGCTAATACCGTATATTCTCTACGGAGGAAAGATTTATCGCTGATGGATGGGCCCGCGTCAGATTAGGTAGTTGGTGAGGTAATGGCTCACCAAGCCGACGATCTGTAGCTGGTCTGAGAGGATGATCAGCCACACTGGGACTGAGACACGGCCCAGACTCCTACGGGAGGCAGCAGTGGGGAATATTGGACAATGGGCGAAAGCCTGATCCAGCAATACCGAGTGAGTGATGAAGGCCTTAGGGTTGTAAAGCTCTTTTAGCA…
17	Clostridium difficile DSM 1296 (Type)
		Accession	CP011968
		Strain	DSM 1296 (Type)
		Taxonomy	Bacteria;Firmicutes;Clostridia;Clostridiales;Peptostreptococcaceae;Clostridioides
		Sequence	GATGAACGCTGGCGGCGTGCCTAACACATGCAAGTTGAGCGATTTACTTCGGTAAAGAGCGGCGGACGGGTGAGTAACGCGTGGGTAACCTACCCTGTACACACGGATAACATACCGAAAGGTATGCTAATACGGGATAATATATTTGAGAGGCATCTCTTGAATATCAAAGGTGAGCCGGTACAGGATGGACCCGCGTCTGATTAGCTAGTTGGTAAGGTAACGGCTTACCAAGGCGACGATCAGTAGCCGACCTGAGAGGGTGATCGGCCACATTGGAACTGAGACACGGTCCAAACTCCTACGGGAGGCAGCAGTGGGGAATATTGCACAATGGGCGAAAGCCTGATGCAGCAACGCCGCGTGAGTGATGAAGGCCTTCGGGTCGTAAAACTCTGT…
18	Streptococcus pneumoniae NCTC 7465 (Type)
		Accession	LN831051
		Strain	NCTC 7465 (Type)
		Taxonomy	Bacteria;Firmicutes;Bacilli;Lactobacillales;Streptococcaceae;Streptococcus
		Sequence	GACGAACGCTGGCGGCGTGCCTAATACATGCAAGTAGAACGCTGAAGGAGGAGCTTGCTTCTCTGGATGAGTTGCGAACGGGTGAGTAACGCGTAGGTAACCTGCCTGGTAGCGGGGGATAACTATTGGAAACGATAGCTAATACCGCATAAGAGTAGATGTTGCATGACATTTGCTTAAAAGGTGCACTTGCATCACTACCAGATGGACCTGCGTTGTATTAGCTAGTTGGTGGGGTAACGGCTCACCAAGGCGACGATACATAGCCGACCTGAGAGGGTGATCGGCCACACTGGGACTGAGACACGGCCCAGACTCCTACGGGAGGCAGCAGTAGGGAATCTTCGGCAATGGACGGAAGTCTGACCGAGCAACGCCGCGTGAGTGAAGAAGGTTTTC…
19	Enterococcus faecalis ATCC 19433 (Type)
		Accession	ASDA01000001
		Strain	ATCC 19433 (Type)
		Taxonomy	Bacteria;Firmicutes;Bacilli;Lactobacillales;Enterococcaceae;Enterococcus
		Sequence	GACGAACGCTGGCGGCGTGCCTAATACATGCAAGTCGAACGCTTCTTTCCTCCCGAGTGCTTGCACTCAATTGGAAAGAGGAGTGGCGGACGGGTGAGTAACACGTGGGTAACCTACCCATCAGAGGGGGATAACACTTGGAAACAGGTGCTAATACCGCATAACAGTTTATGCCGCATGGCATAAGAGTGAAAGGCGCTTTCGGGTGTCGCTGATGGATGGACCCGCGGTGCATTAGCTAGTTGGTGAGGTAACGGCTCACCAAGGCCACGATGCATAGCCGACCTGAGAGGGTGATCGGCCACACTGGGACTGAGACACGGCCCAGACTCCTACGGGAGGCAGCAGTAGGGAATCTTCGGCAATGGACGAAAGTCTGACCGAGCAACGCCGCGTGAG…
20	Bacillus atrophaeus (ATCC9372)
		Accession	AB021181
		Strain	JCM 9070 (Type)
		Taxonomy	Bacteria;Firmicutes;Bacilli;Bacillales;Bacillaceae;Bacillus
		Sequence	GACGAACGCTGGCGGCGTGCCTAATACATGCAAGTCGAGCGGACAGATGGGAGCTTGCTCCCTGATGTTAGCGGCGGACGGGTGAGTAACACGTGGGTAACCTGCCTGTAAGACTGGGATAACTCCGGGAAACCGGGGCTAATACCGGATGCTTGTTTGAACCGCATGGTTCAAACATAAAAGGTGGCTTCGGCTACCACTTACAGATGGACCCGCGGCGCATTAGCTAGTTGGTGAGGTAACGGCTCACCAAGGCAACGATGCGTAGCCGACCTGAGAGGGTGATCGGCCACACTGGGACTGAGACACGGCCCAGACTCCTACGGGAGGCAGCAGTAGGGAATCTTCCGCAATGGACGAAAGTCTGACGGAGCAACGCCGCGTGAGTGATGAAGGTTT…
21	Staphylococcus epidermidis (ATCC14990)
		Accession	L37605
		Strain	ATCC 14990 (Type)
		Taxonomy	Bacteria;Firmicutes;Bacilli;Bacillales;Staphylococcaceae;Staphylococcus
		Sequence	GATGAACGCTGGCGGCGTGCCTAATACATGCAAGTCGAGCGAACAGACGAGGAGCTTGCTCCTCTGACGTTAGCGGCGGACGGGTGAGTAACACGTGGATAACCTACCTATAAGACTGGGATAACTTCGGGAAACCGGAGCTAATACCGGATAATATATTGAACCGCATGGTTCAATAGTGAAAGACGGTTTTGCTGTCACTTATAGATGGATCCGCGCCGCATTAGCTAGTTGGTAAGGTAACGGCTTACCAAGGCAACGATGCGTAGCCGACCTGAGAGGGTGATCGGCCACACTGGAACTGAGACACGGTCCAGACTCCTACGGGAGGCAGCAGTAGGGAATCTTCCGCAATGGGCGAAAGCCTGACGGAGCAACGCCGCGTGAGTGATGAAGGTC…
22	Staphylococcus aureus
		Accession	AMYL01000007
		Strain	DSM 20231 (Type)
		Taxonomy	Bacteria;Firmicutes;Bacilli;Bacillales;Staphylococcaceae;Staphylococcus;Staphylococcus aureus
		Sequence	GATGAACGCTGGCGGCGTGCCTAATACATGCAAGTCGAGCGAACGGACGAGAAGCTTGCTTCTCTGATGTTAGCGGCGGACGGGTGAGTAACACGTGGATAACCTACCTATAAGACTGGGATAACTTCGGGAAACCGGAGCTAATACCGGATAATATTTTGAACCGCATGGTTCAAAAGTGAAAGACGGTCTTGCTGTCACTTATAGATGGATCCGCGCTGCATTAGCTAGTTGGTAAGGTAACGGCTTACCAAGGCAACGATGCATAGCCGACCTGAGAGGGTGATCGGCCACACTGGAACTGAGACACGGTCCAGACTCCTACGGGAGGCAGCAGTAGGGAATCTTCCGCAATGGGCGAAAGCCTGACGGAGCAACGCCGCGTGAGTGATGAAGGTC…
	16S rRNA sequences analyzed by MEGA7 were obtained from the public data base EzBioCloud (http://www.ezbiocloud.net/taxonomy).
